# Supplementary material for: Dependence of the Sperm/Oocyte Decision on the Nucleosome Remodeling Factor Complex Was Acquired during Recent Caenorhabditis briggsae Evolution
Source: PubMed Central journal article supplement (PMC4166919; doi:10.1093/molbev/msu198), 2014-07-01
Supplement: supp_msu198_NURF_MBE_SUP.pdf [file supp_msu198_NURF_MBE_SUP.pdf]

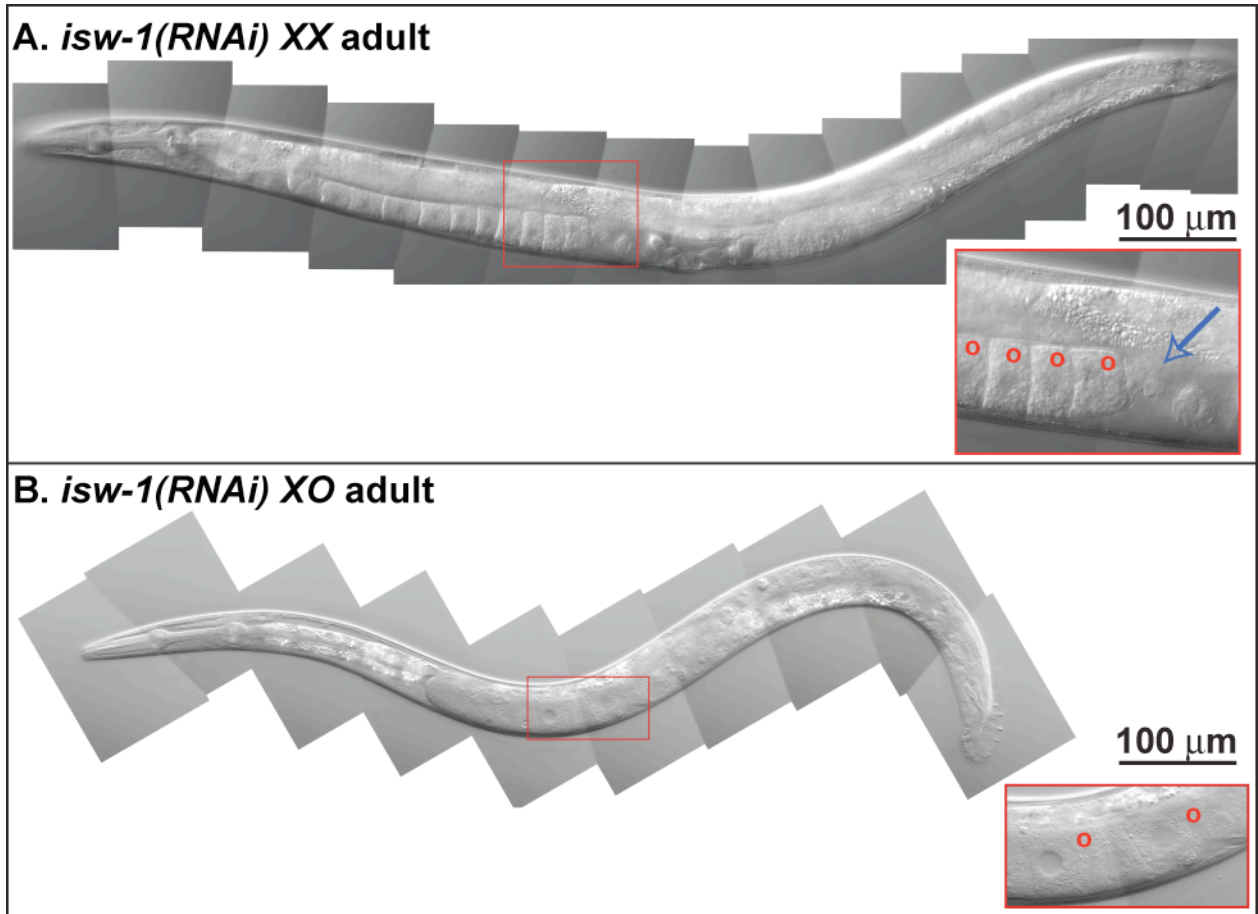

**Figure S1. *C. briggsae* ISW-1 controls the sperm/oocyte decision.**

A. *C. briggsae isw-1(RNAi)* XX Fog adult. B. *C. briggsae isw-1(RNAi)* XO Fog male. In both panels, anterior is left and ventral is down. The scale bars apply to the main panels; the size of each inset is shown by a box on the main panel. Finally, “o” indicates oocytes and a hollow blue arrow marks an empty spermatheca.

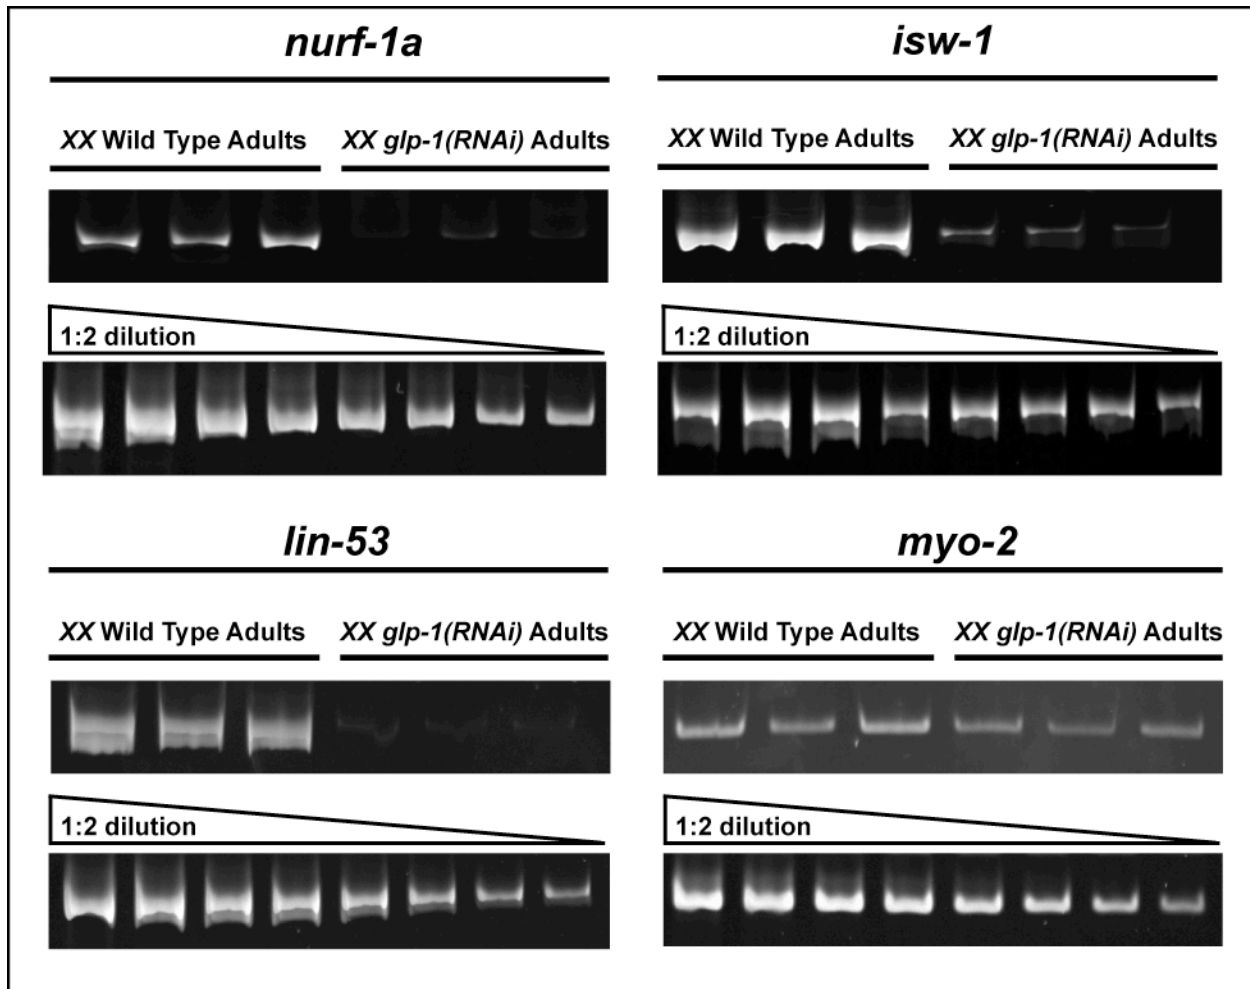

**Figure S2. Components of the NURF complex are predominantly expressed in germ cells.** Electrophoresis images of semi-quantitative RT-PCR experiments. Three biological replicates were assayed for each experiment (upper panels). Each lane contains equivalent amounts of cDNA isolated from a pool of five *XX* adults of the indicated genotype. The *glp-1(RNAi)* animals lacked germ cells. A 1:2 dilution series of wild-type cDNA template was tested for each target gene to show that the reactions were sensitive to changes in template concentration (lower panels). The endogenous control was *myo-2*, which is expressed exclusively in muscle.

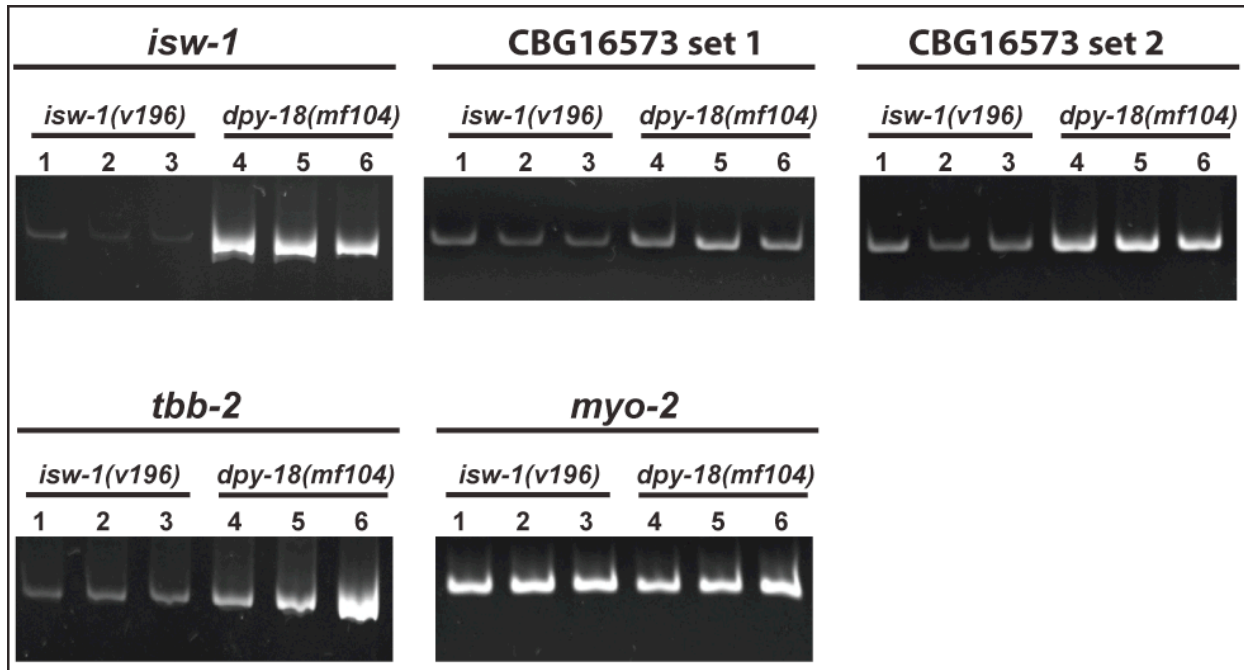

**Figure S3. *isw-1(v196)* is a null allele.**

Semi-quantitative RT-PCR analysis of samples from the homozygous *isw-1(v196)* progeny of *isw-1(v196) +/+ dpy-18* mothers, and from control *dpy-18* animals. Three independent biological replicates were used for each sample. The expression profiles of *isw-1* and the two nearby genes are shown in the top three panels, and that of two controls in the bottom panel. The *tbb-2* gene encodes a  $\beta$ -tubulin, and *myo-2* encodes a muscle-specific myosin heavy chain. The faint *isw-1* bands in *v196* are unspliced genomic DNA.

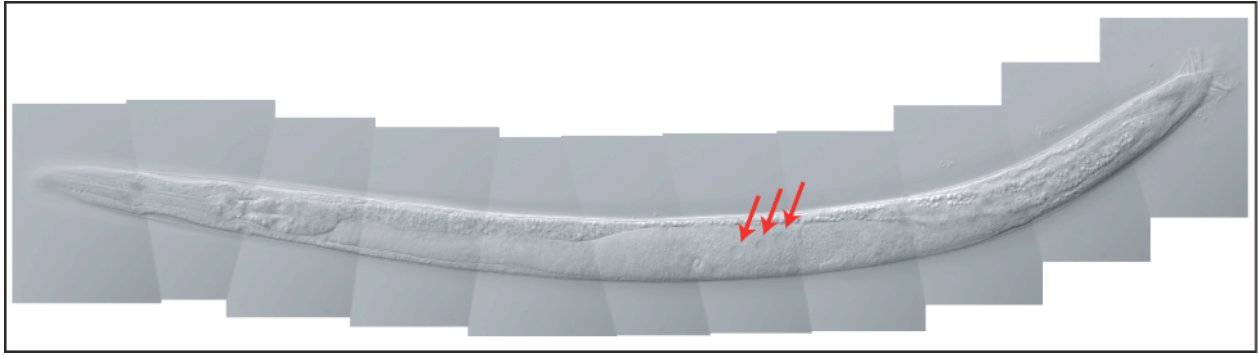

**Figure S4. Lowering the dose of *cbr-isw-1* can cause oogenesis in males.**

DIC photomicrograph of an *isw-1(v196/+)* male, showing oocytes (red arrows). Anterior is to the left and ventral down.

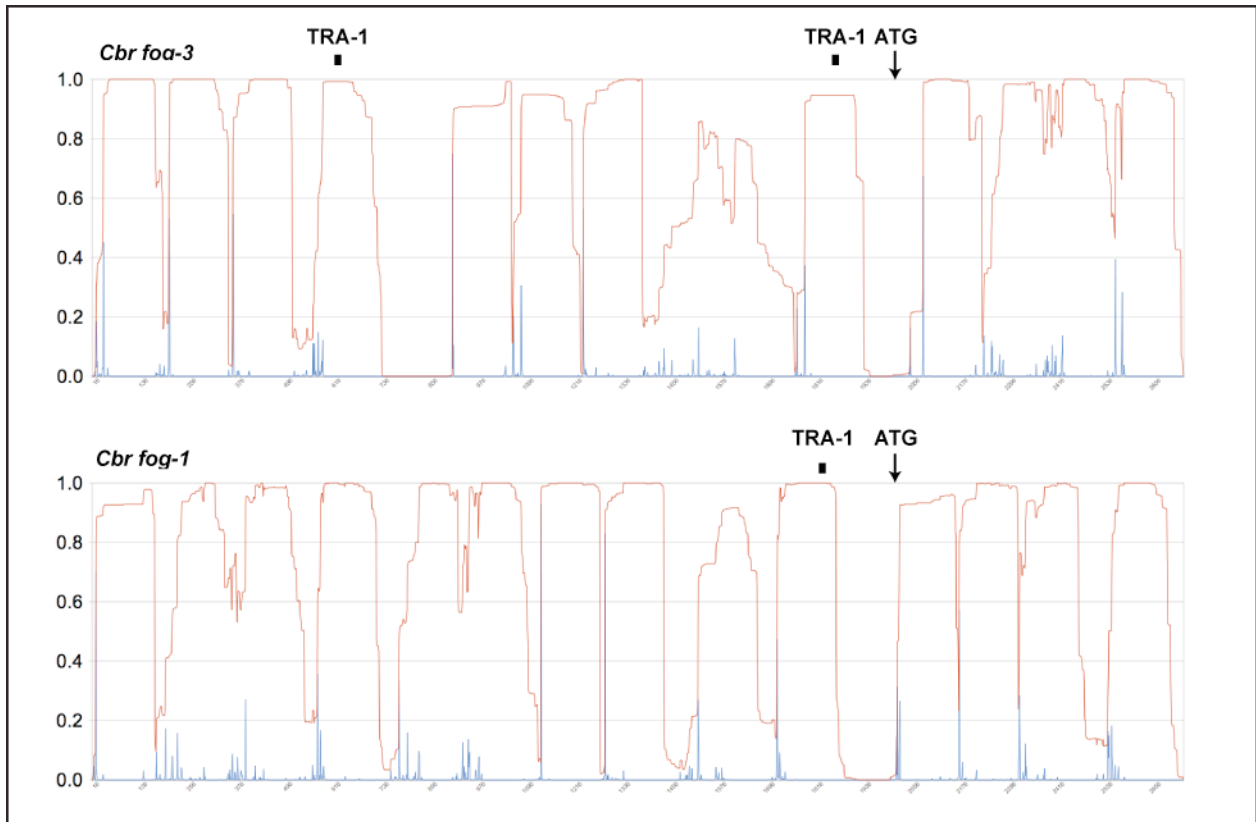

**Figure S5. The TRA-1 binding sites in *Cbr-fog-1* and *Cbr-fog-3* are buried in nucleosomes.** Graphs showing the beginnings of the *Cbr-fog-1* and *Cbr-fog-3* genes; each one includes 2000 nucleotides of genomic DNA upstream of the ATG. The Nucleosome Occupancy score is shown in red, and the probability that each base is the start of a nucleosome binding site is in blue (Xi et al., 2010). The predicted TRA-1 binding sites are marked by black line segments.

**Table S1. No synthetic feminization between *C. elegans fog-1(q253ts)* and NURF RNAi**

| <b>Genetic Background</b>                  | <b>RNAi Target</b> | <b>Fertile hermaphrodite</b> | <b>Fog</b> | <b>Sterile</b>   | <b>Lethal</b> | <b>n</b> |
|--------------------------------------------|--------------------|------------------------------|------------|------------------|---------------|----------|
| wild type                                  | <i>Cel-nurf-1a</i> | 98%                          | 0%         | 0%               | 2%*           | 273      |
| wild type                                  | <i>Cel-isw-1</i>   | 32%                          | 0%         | 67% <sup>†</sup> | 1%*           | 384      |
| <i>Cel-fog-1(q253ts)</i>                   | none               | 99.4%                        | 0.6%       | 0%               | 0%            | 516      |
| <i>Cel-fog-1(q253ts)</i>                   | <i>Cel-nurf-1a</i> | 100%                         | 0%         | 0%               | 0%            | 812      |
| <i>Cel-fog-1(q253ts)</i>                   | <i>Cel-isw-1</i>   | 55%                          | 0%         | 45%              | 0%            | 278      |
| *- animals died as embryos                 |                    |                              |            |                  |               |          |
| †- animals made sperm and abnormal oocytes |                    |                              |            |                  |               |          |

**Table S2. RNAi targeting NURF-1 only causes a Fog phenotype in *C. briggsae* XO males**

| Species            | Target                      | Oocytes only | Sperm & oocytes | Sperm only       | Other            | n   |
|--------------------|-----------------------------|--------------|-----------------|------------------|------------------|-----|
| <i>C. briggsae</i> | <i>nurf-1a</i>              | 62%          | 9%              | 20%              | 9%*              | 44  |
| <i>C. briggsae</i> | <i>nurf-1a</i> <sup>†</sup> | 0%           | 50%             | 10%              | 40%*             | 20  |
| <i>C. briggsae</i> | <i>isw-1</i>                | 0%           | 93%             | 0%               | 7%*              | 30  |
| <i>C. briggsae</i> | <i>isw-1</i> <sup>‡</sup>   | 20%          | 4%              | 76%              | 0%               | 24  |
| <i>C. elegans</i>  | <i>nurf-1a</i>              | 0%           | 0%              | 98%              | 2%§              | 63  |
| <i>C. elegans</i>  | <i>isw-1</i>                | 0%           | 0%              | 100%             | 0%               | 28  |
| <i>C. sp. 9</i>    | <i>nurf-1a</i>              | 0%           | 0%              | 57%              | 42%              | 170 |
| <i>C. sp. 9</i>    | <i>nurf-1a</i> <sup>¶</sup> | 0%           | 0%              | 46%              | 54% <sup>α</sup> | 41  |
| <i>C. sp. 9</i>    | <i>isw-1</i>                | 0%           | 0%              | 40%              | 60% <sup>β</sup> | 82  |
| <i>C. sp. 9</i>    | <i>fog-3</i>                | 42%          | 0%              | 45%              | 13% <sup>γ</sup> | 38  |
| <i>C. remanei</i>  | <i>nurf-1a</i>              | 0%           | 0%              | 92% <sup>δ</sup> | 8% <sup>ε</sup>  | 66  |
| <i>C. remanei</i>  | <i>isw-1</i>                | 0%           | 0%              | 12%              | 88% <sup>ζ</sup> | 58  |

\* - Germ lines had undifferentiated germ cells, and some had vacuoles.

† - Injected with 1.0 mg/ml *C. sp. 9 nurf-1a* dsRNA.

‡ - Injected with 1.0 mg/ml *C. sp. 9 isw-1* dsRNA.

§ - Sperm leaked from the gonad.

|| - 71 animals had undifferentiated germ cells; of these animals, 23 had abnormally small germ lines, 6 worms had ruptured gonads, and 3 worms had vacuoles in the germ line.

¶ - Injected with 0.5 mg/ml *C. sp. 9 nurf-1a* dsRNA.

α - 20 animals had small germ lines with undifferentiated germ cells, and 2 animals had disorganized germ lines with vacuoles.

β - These animals had small germ lines with undifferentiated germ cells.

γ - Undifferentiated germ cells.

δ - Out of these males, 10 had small germ lines with few sperm.

ε - These animals had small germ lines without sperm or spermatocytes.

ζ - 49 animals had small germ lines with undifferentiated germ cells, and 5 of these also had vacuoles. 2 animals had normal-sized germ lines with spermatocytes but no sperm.

**Table S3. Primers used for RNA interference**

| <b>Target</b>                 | <b>Sequence</b>                                                                                                                                                                                                              |
|-------------------------------|------------------------------------------------------------------------------------------------------------------------------------------------------------------------------------------------------------------------------|
| <i>Cbr-nurf-1a</i> exon 2     | F: TAATACGACTCACTATAGGGAGAAAATCCCGGAAGACCCGTCAAGAA<br>R: TAATACGACTCACTATAGGGAGATCCGTCACCGAATAATGCGTTTGC                                                                                                                     |
| <i>Cbr-nurf-1a</i> exon 7     | F: TAATACGACTCACTATAGGGAGACTAGTCCGCAAGAAGCAAACCTGAC<br>R: TAATACGACTCACTATAGGGAGACCATCTTCTTCACTTTCTGCTGTTC                                                                                                                   |
| <i>Cbr-nurf-1.2cef</i>        | F: TAATACGACTCACTATAGGGAGATCTGCGAACCTCTCCAAATCGGAA<br>R: TAATACGACTCACTATAGGGAGAGCAATACAGCGCTGGTTGTTCCTT                                                                                                                     |
| <i>Cbr-isw-1</i>              | F: TAATACGACTCACTATAGGGAGATCTTGGAATCAACTTGGCAACCGC<br>R: TAATACGACTCACTATAGGGAGATGGCTCGATCCAGAAAATGACCCAT                                                                                                                    |
| <i>Cbr-lin-53</i>             | F: TAATACGACTCACTATAGGGAGAGAGCGTGCAATGGCTTCCAGAAAAT<br>R: TAATACGACTCACTATAGGGAGATCTGGTCTGCTGAAGCGGAAAAGAA                                                                                                                   |
| <i>Cbr-rba-1</i>              | F: TAATACGACTCACTATAGGGAGAAAATCTCTGGGATCTTCGTCACCCA<br>R: TAATACGACTCACTATAGGGAGAGGCGATTCGAGTTCCACGAGAAAAT                                                                                                                   |
| <i>Cbr-pyp-1</i>              | F: TAATACGACTCACTATAGGGAGATATCAAGCCGTTGAGCGTGGATCT<br>R: TAATACGACTCACTATAGGGAGAAATCAGTGCCAATGTTCCGAGGACT                                                                                                                    |
| <i>Cel-nurf-1a</i>            | F: TAATACGACTCACTATAGGGAGACAGGATATTCGATTCCAACGGCT<br>R: TAATACGACTCACTATAGGGAGAAAGTAGTGCGTCTGCTCTTCATCGT                                                                                                                     |
| <i>Cel-isw-1</i>              | F: TAATACGACTCACTATAGGGAGATGGAATCAACTTGGCTACCGCTGA<br>R: TAATACGACTCACTATAGGGAGAAAGAAAATGACCCATTCCGTCGGCTT                                                                                                                   |
| <i>Cre-nurf-1a</i>            | F: TAATACGACTCACTATAGGGAGATCCCAAAGCTAGACCTTCCAGAGA<br>R: TAATACGACTCACTATAGGGAGAGTATCAGCAAACGGATACGCCTCA                                                                                                                     |
| <i>C. sp.9 nurf-1a</i> exon 2 | F: TAATACGACTCACTATAGGGAGAAAATCCCGGAAGAGCCGTCAAGAA<br>R: TAATACGACTCACTATAGGGAGAACCGAATAATGCGTCTGCTCCTCA                                                                                                                     |
| <i>C. sp.9 fog-3</i>          | Fa: TAATACGACTCACTATAGGGAGAAAGTTCCGAGAAGAGCAACCGGAAT<br>Ra: TAATACGACTCACTATAGGGAGAGCGAATGTGGGAAAGGTTTCGAGTT<br>Fb: TAATACGACTCACTATAGGGAGAAAGTTCCGAGAAGAGCAACCGGAAT<br>Rb: TAATACGACTCACTATAGGGAGATGTTGTTGACCAGTTTCGAGCACAG |



**Table S4A. Primers used for semi-quantitative RT-PCR**

| <b>Target</b>      | <b>Sequence</b>                                                                                           |
|--------------------|-----------------------------------------------------------------------------------------------------------|
| <i>Cbr-nurf-1a</i> | F: AAATCCCGGAAGACCCGTCAAGAA<br>R: TCCGTCACCGAATAATGCGTTTGC                                                |
| <i>Cbr-isw-1</i>   | F: TAATACGACTCACTATAGGGAGATCTTGGAAATCAACTTGGCAACCGC<br>R: TAATACGACTCACTATAGGGAGATGGCTCGATCCAGAAATGACCCAT |
| <i>Cbr-lin-53</i>  | F: TAATACGACTCACTATAGGGAGAGAGCGTGCAATGGCTTCCAGAAAT<br>R: TAATACGACTCACTATAGGGAGATCTGGTCTGTAAGCGGAAAGAA    |
| <i>Cbr-myo-2</i>   | F: AAGGTGCTGCCAGAGTAACATTCG<br>R: GAAACTTGCGAGCACCGGTTTCAA                                                |

**Table S4. Primers used for real-time quantitative RT-PCR**

| <b>Target</b>      | <b>Sequence</b>                                        |
|--------------------|--------------------------------------------------------|
| <i>Cbr-fog-1</i>   | F: GCTTCCGAGTTTTGAGTGTG<br>R: GCTGGTAGGAGAATATGTTGG    |
| <i>Cbr-fog-3</i>   | F: CCTAGAAATGGTCAAATGGAGAG<br>R: TTCTGGAATTGGCTGATAGTG |
| <i>Cbr-spe-4</i>   | F: AATTGGACAACCGGAATC<br>R: GCCCAAACATCCATAGACAAC      |
| <i>Cbr-rpb-1</i>   | F: CGACAACCCACTCTCCATAA<br>R: GCCAATCGATGAAGATGTCAC    |
| <i>Cbr-nurf-1a</i> | F: CCGTTTCCAGACATCCTAGT<br>R: GAGAAGTTGGTACAGTTGAGG    |
| <i>Cbr-isw-1</i>   | F: ACAGGCAGAACAAATGGG<br>R: GCTGGAACGTCTTTTGGTC        |
